# Supplementary material
Source: PubMed Central journal article supplement (PMC7777188)
Supplement: pnas.2006209117.sapp.pdf [file pnas.2006209117.sapp.pdf]

# PNAS

[www.pnas.org](http://www.pnas.org)

Supplementary Information for

**Identification of Z-nucleotides as an ancient signal for two-component system activation in bacteria**

Oscar J. Vázquez-Ciros, Adrián F. Alvarez and Dimitris Georgellis\*

\* Dimitris Georgellis

Email: [dimitris@ifc.unam.mx](mailto:dimitris@ifc.unam.mx)

**This PDF file includes:**

Figure S1  
Legend for Figure S1

**Fig. S1**

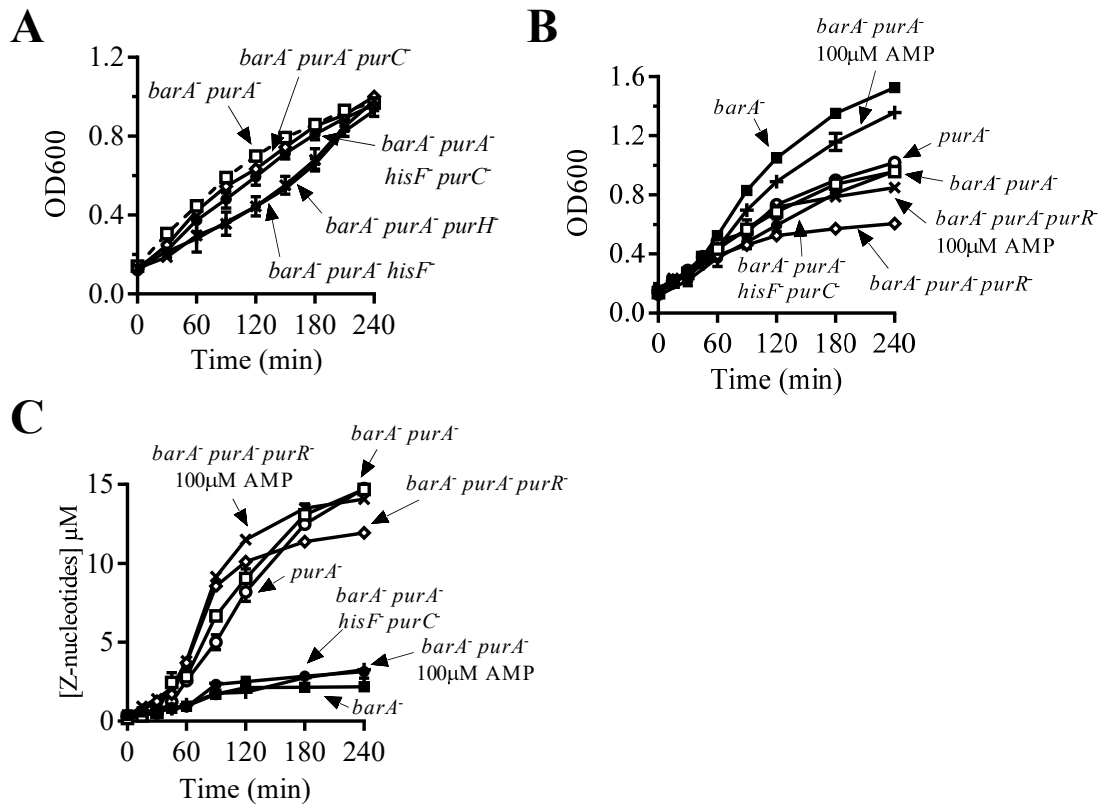

**Fig. S1.** Cell growth and Z-nucleotides determination. **A)** Cell growth, plotted as OD<sub>600nm</sub> versus time, of cultures used for β-galactosidase quantification presented in Fig. 3B. Strains IFC6007 (*barA<sup>-</sup> purA<sup>-</sup>*) (open squares), IFC6013 (*barA<sup>-</sup> purA<sup>-</sup> purH<sup>-</sup>*) (open diamonds), IFC6010 (*barA<sup>-</sup> purA<sup>-</sup> purC<sup>-</sup>*) (plusses), IFC6011 (*barA<sup>-</sup> purA<sup>-</sup> hisF<sup>-</sup>*) (crosses) and IFC6012 (*barA<sup>-</sup> purA<sup>-</sup> purC<sup>-</sup> hisF<sup>-</sup>*) (filled circles), are shown. **B)** Cell growth, plotted as OD<sub>600nm</sub> versus time, (used for Z-nucleotides quantification presented in Fig. 3D) and **C)** Z-nucleotides concentration, expressed as OD<sub>545nm</sub>/4.5 × 10<sup>4</sup> M<sup>-1</sup>, in cultures of strains IFC6001 (*purA<sup>-</sup>*) (open circles), IFC6002 (*barA<sup>-</sup>*) (filled squares), IFC6007 (*barA<sup>-</sup> purA<sup>-</sup>*) (open squares), IFC6014 (*barA<sup>-</sup> purA<sup>-</sup> purR<sup>-</sup>*) (open diamonds) and IFC6012 (*barA<sup>-</sup> purA<sup>-</sup> purC<sup>-</sup> hisF<sup>-</sup>*) (filled circles) grown in LB medium, and strains IFC6007 (*barA<sup>-</sup> purA<sup>-</sup>*) (plusses) and IFC6014 (*barA<sup>-</sup> purA<sup>-</sup> purR<sup>-</sup>*) (crosses) grown in LB medium supplemented with 100 μM of AMP. Data represent the averages from three independent experiments, and the standard deviation values are indicated.
